# Supplementary material for: HIF-1–dependent regulation of lifespan in Caenorhabditis elegans by the acyl-CoA–binding protein MAA-1
Source: PubMed Central journal article supplement (PMC5559173; doi:10.18632/aging.101267), 2017-07-27
Supplement: aging-09-1745-s001.pdf [file aging-09-1745-s001.pdf]

SUPPLEMENTARY MATERIAL

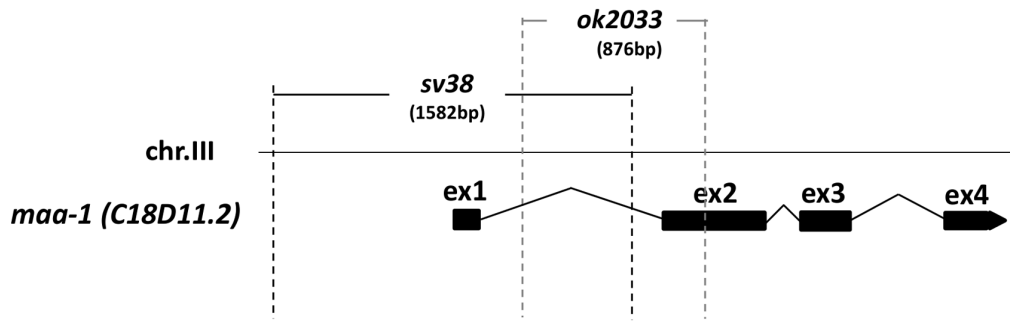

Figure S1. Gene structure of wildtype *maa-1* (C18D11.2), *maa-1(sv38)* and *maa-1(ok2033)* deletion alleles.

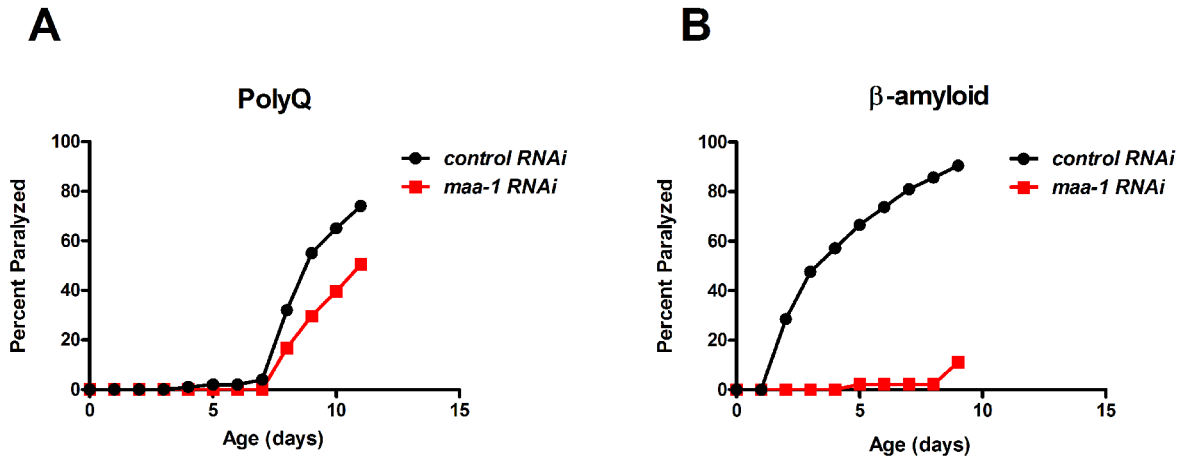

Figure S2. Loss of *maa-1* increases resistance to stress. Repetition of the experiments shown in Figure 2C, D. (A-B) *maa-1* RNAi increases resistance to paralysis induced by aggregation of a 35-residue polyglutamine repeat protein (A) or human  $\beta$ -amyloid (B) ( $P < 0.0001$  for both A and B). P values were calculated using the log-rank (Mantel-Cox) method.

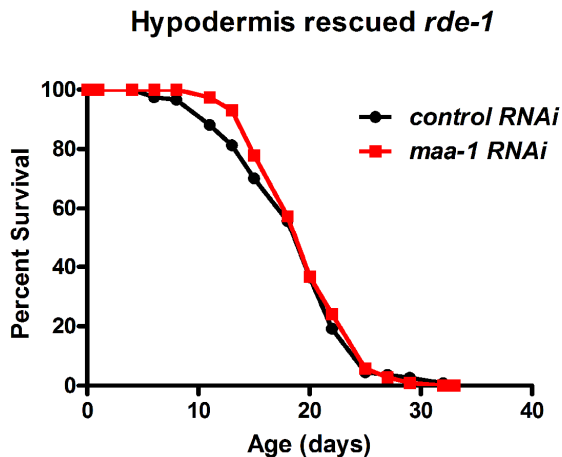

Figure S3. Hypodermal downregulation of *maa-1* does not extend lifespan. Lifespan of *rde-1(ne219)* mutants in which *rde-1* expression is restored in the hypodermis using the *wrt-2* promoter; animals were subjected to control or *maa-1* RNAi ( $P = 0.4960$ ). P values were calculated using the log-rank (Mantel-Cox) method. Replicate experiments and statistical analysis are shown in Table S1 and S2.

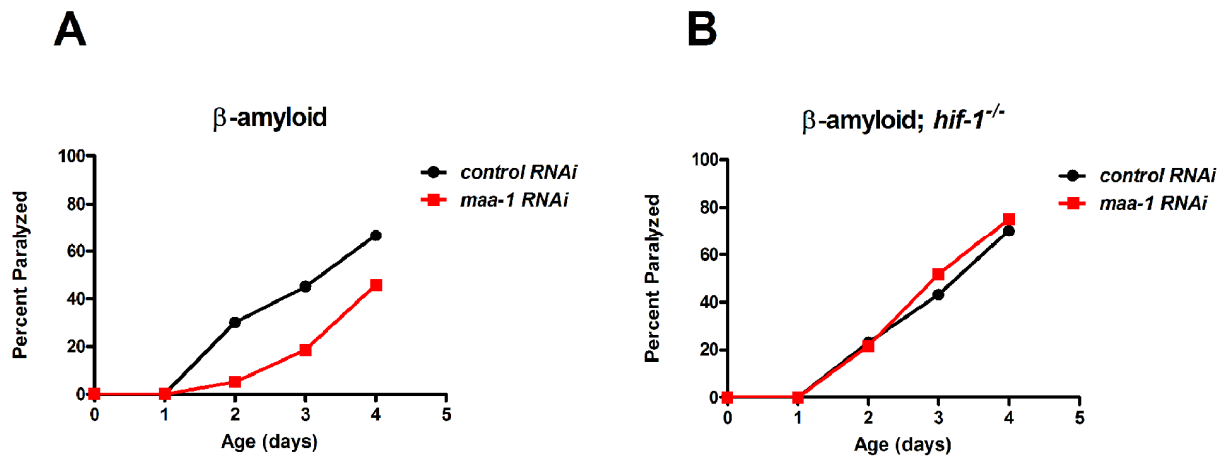

**Figure S4. HIF-1 mediates the effect of loss of *maa-1* on proteotoxic stress.** (A) *maa-1* RNAi increases resistance to paralysis induced by aggregation of human  $\beta$ -amyloid ( $P < 0.0001$ ). (B) The effect is absent in transgenic animals lacking *hif-1*. P values were calculated using the log-rank (Mantel-Cox) method.

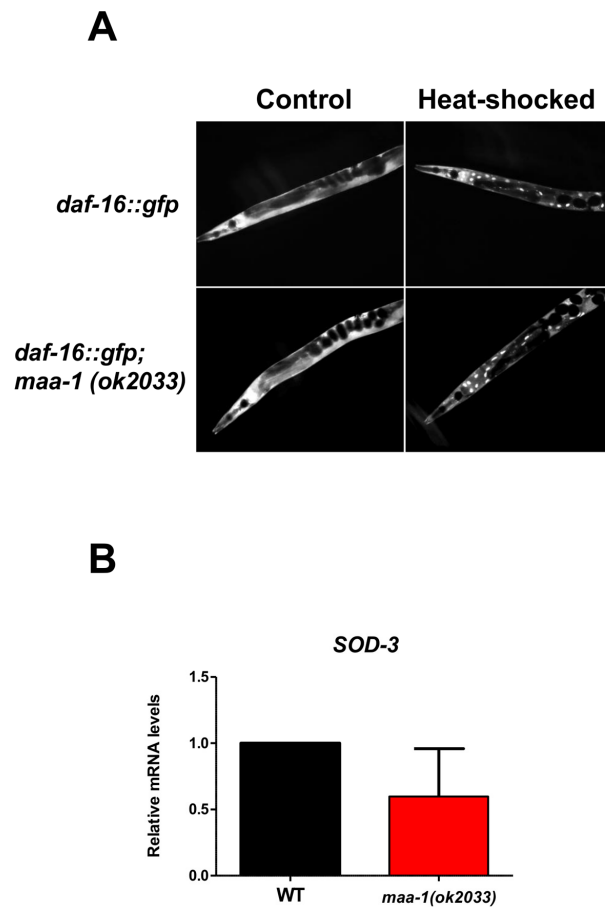

**Figure S5. DAF-16 nuclear localization and transcriptional activity are not affected by loss of *maa-1*.** (A) Localization of DAF-16 in wildtype and *maa-1(ok2033)* mutants expressing a *daf-16::GFP* transgene. Animals were incubated at 20°C (left panels) and at 37°C (right panels). (B) qPCR of *sod-3* expression in wild-type and *maa-1(ok2033)* mutants.

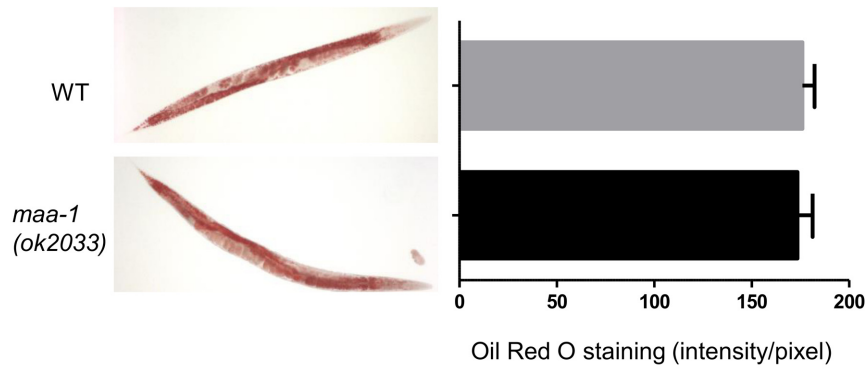

**Figure S6. Total lipid content is not affected by loss of *maa-1*.** Visualization of whole worm total lipid content by Oil Red O staining of wildtype and *maa-1(ok2033)* mutants. Representative pictures are shown in the left panels, and quantification of staining by optical density is shown in the right graph.

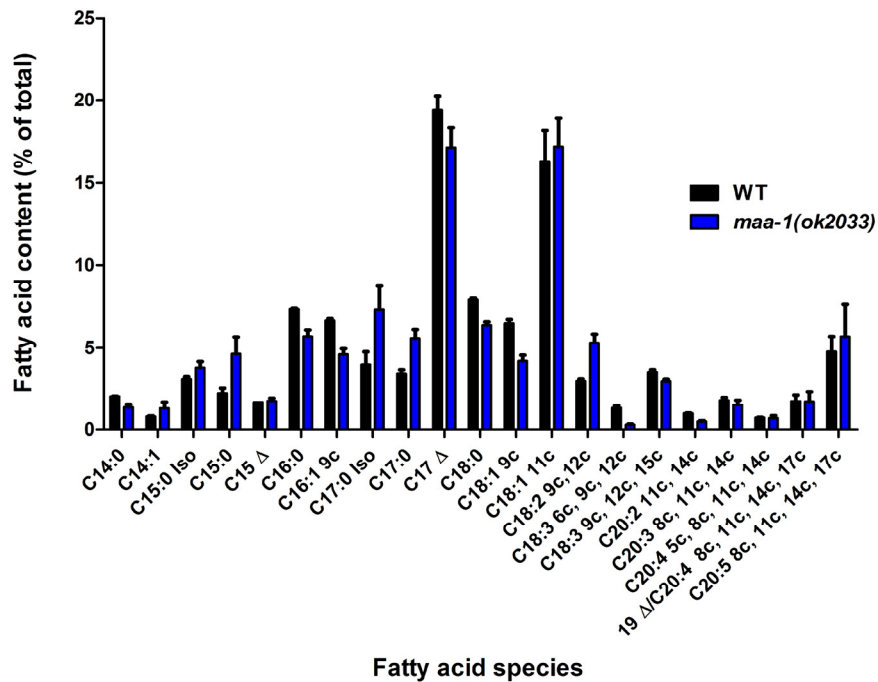

**Figure S7. Loss of MAA-1 does not substantially affect total fatty acid content.** Quantification of fatty acids in wild-type and *maa-1(ok2033)* animals obtained by gas chromatography. Error bars show the standard deviation from three samples obtained from independent preparations.

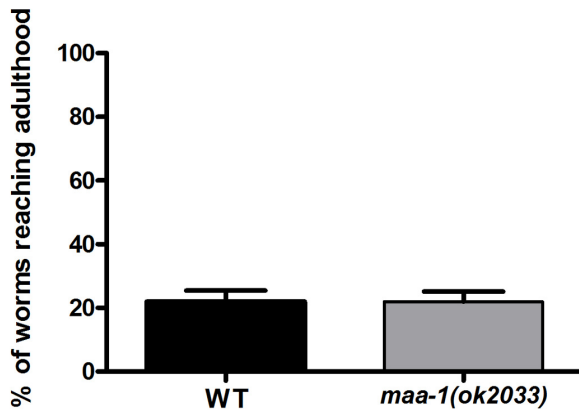

**Figure S8. Loss of *maa-1* does not activate the UPR<sup>ER</sup>.** Percentage of worms reaching adulthood after 72 h of development from eggs laid on plates containing OP50 bacteria and tunicamycin (3 µg/ml).

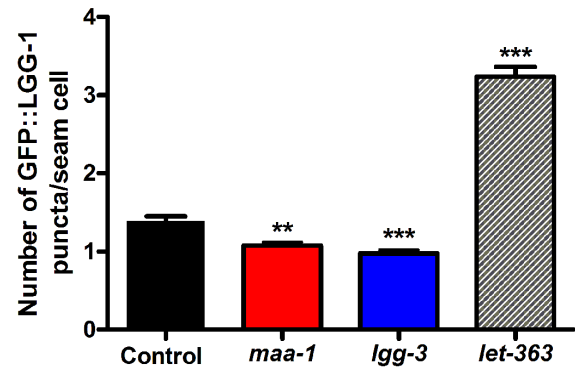

**Figure S9. Autophagy is reduced in response to *maa-1* downregulation.** Quantification of LGG-1::GFP punctae per seam cell of wildtype *C. elegans* subjected to control, *maa-1*, *lgg-3* (essential for autophagy), or *let-363* (*CeTOR*) RNAi (one-way ANOVA: \*P<0.05, \*\*P<0.001 vs control RNAi).

**Table S1. Summary of adult lifespan data presented in this work.**

| Strain /Treatment      | Maximum Lifespan | Mean Lifespan ± SE (days) | Number of worms (N) | Change (mean lifespan) | P-Value vs control | Figure in text |
|------------------------|------------------|---------------------------|---------------------|------------------------|--------------------|----------------|
| WT/control RNAi        | 31               | 20.36 ± 0.51              | 103                 |                        |                    | 1A             |
| WT/ <i>maa-1</i> RNAi  | 33               | 24.29 ± 0.51              | 89                  | 19%                    | < 0.0001           | 1A             |
| WT/control RNAi        | 30               | 19.67 ± 0.49              | 123                 |                        |                    | Not shown      |
| WT/ <i>maa-1</i> RNAi  | 32               | 21.99 ± 0.44              | 120                 | 11%                    | <0.01              | Not shown      |
| WT/control RNAi        | 28               | 16.84 ± 0.35              | 109                 |                        |                    | Not shown      |
| WT/ <i>maa-1</i> RNAi  | 30               | 21.39 ± 0.40              | 120                 | 27%                    | < 0.0001           | Not shown      |
| WT/control RNAi        | 31               | 19.88 ± 0.46              | 122                 |                        |                    | 1B             |
| WT/ <i>acbp-1</i> RNAi | 32               | 21.75 ± 0.50              | 118                 | 9%                     | 0.0052             | 1B             |
| WT/ <i>acbp-3</i> RNAi | 31               | 21.71 ± 0.42              | 113                 | 9%                     | 0.0565             | 1B             |
| WT                     | 30               | 19.70 ± 0.44              | 115                 |                        |                    | 1C             |
| <i>maa-1(ok2033)</i>   | 34               | 25.12 ± 0.55              | 104                 | 27%                    | < 0.0001           | 1C             |
| WT                     | 29               | 20.78 ± 0.47              | 105                 |                        |                    | Not shown      |
| <i>maa-1(ok2033)</i>   | 33               | 24.60 ± 0.48              | 96                  | 18%                    | < 0.0001           | Not shown      |
| WT                     | 28               | 20.88 ± 0.28              | 183                 |                        |                    | Not shown      |
| <i>maa-1(ok2033)</i>   | 33               | 24.68 ± 0.32              | 189                 | 18%                    | < 0.0001           | Not shown      |

|                                          |    |              |     |                                  |                  |           |
|------------------------------------------|----|--------------|-----|----------------------------------|------------------|-----------|
| WT                                       | 29 | 19.49 ± 0.37 | 120 |                                  |                  | 1D        |
| <i>maa-1(sv38)</i>                       | 35 | 24.59 ± 0.55 | 98  | 26%                              | < 0.0001         | 1D        |
| WT                                       | 28 | 18.89 ± 0.58 | 92  |                                  |                  | Not shown |
| <i>maa-1(sv38)</i>                       | 32 | 22.70 ± 0.43 | 101 | 20%                              | <0.001           | Not shown |
| MR0931/control RNAi                      | 27 | 18.70 ± 0.40 | 108 |                                  |                  | 3A        |
| MR0931/ <i>maa-1</i> RNAi                | 32 | 21.64 ± 0.50 | 99  | 15%                              | < 0.0001         | 3A        |
| NR222/control RNAi                       | 27 | 19.23 ± 0.40 | 100 |                                  |                  | 3B        |
| NR222/ <i>maa-1</i> RNAi                 | 30 | 20.59 ± 0.43 | 102 | 7%                               | <0.05            | 3B        |
| WM27/control RNAi                        | 33 | 20.28 ± 0.46 | 109 |                                  |                  | 3C        |
| WM27/ <i>maa-1</i> RNAi                  | 30 | 20.35 ± 0.42 | 110 | 0.3%                             | 0.8513           | 3C        |
| MR0931/control RNAi                      | 30 | 20.34 ± 0.50 | 115 |                                  |                  | Not shown |
| MR0931/ <i>maa-1</i> RNAi                | 32 | 22.39 ± 0.52 | 112 | 10%                              | <0.01            | Not shown |
| NR222/control RNAi                       | 30 | 22.07 ± 0.43 | 119 |                                  |                  | Not shown |
| NR222/ <i>maa-1</i> RNAi                 | 26 | 21.82 ± 0.31 | 113 | -1%                              | 0.0702           | Not shown |
| MR0931/control RNAi                      | 22 | 15.60± 0.34  | 112 |                                  |                  | Not shown |
| MR0931/ <i>maa-1</i> RNAi                | 25 | 17.77± 0.30  | 89  | 14%                              | <0.005           | Not shown |
| JM43/control RNAi                        | 33 | 19.02±0.5    | 118 |                                  |                  | S3        |
| JM43/ <i>maa-1</i> RNAi                  | 32 | 19.96±0.4    | 118 | 5%                               | 0.4960           | S3        |
| JM43/control RNAi                        | 31 | 21.66±0.39   | 144 |                                  | -                | Not shown |
| JM43/ <i>maa-1</i> RNAi                  | 29 | 22.06±0.33   | 133 | 2%                               | 0.6842           | Not shown |
| JM43/control RNAi                        | 31 | 22.21±0.4    | 117 |                                  | -                | Not shown |
| JM43/ <i>maa-1</i> RNAi                  | 35 | 23.92±0.54   | 103 | 8%                               | <0.001           | Not shown |
| WT/control RNAi                          | 33 | 20.20 ± 0.49 | 119 |                                  |                  | 4A        |
| WT/ <i>hif-1</i> RNAi                    | 33 | 20.79 ± 0.34 | 117 | 3%                               | 0.4459           | 4A        |
| <i>maa-1(ok2033)</i> /control RNAi       | 38 | 25.81 ± 0.53 | 107 | 27%                              | < 0.0001         | 4A        |
| <i>maa-1(ok2033)</i> / <i>hif-1</i> RNAi | 38 | 23.76 ± 0.63 | 112 | 17% vs WT<br>-8% vs <i>maa-1</i> | < 0.0001<br>0.10 | 4A        |
| WT                                       | 30 | 19.56 ± 0.43 | 125 |                                  |                  | 4B        |
| <i>maa-1(ok2033)</i>                     | 37 | 24.13 ± 0.47 | 128 | 23%                              | <0.0001          | 4B        |

|                                    |    |              |     |                                                           |                              |           |
|------------------------------------|----|--------------|-----|-----------------------------------------------------------|------------------------------|-----------|
| <i>hif-1(ia04)</i>                 | 32 | 21.48 ± 0.47 | 129 | 9%                                                        | 0.0010                       | 4B        |
| <i>maa-1(ok2033);hif-1(ia04)</i>   | 30 | 20.36 ± 0.42 | 122 | 4% vs WT<br>-16% vs <i>maa-1</i>                          | 0.2661<br><0.0001            | 4B        |
| WT                                 | 30 | 19.34± 0.40  | 117 |                                                           |                              | Not shown |
| <i>maa-1(ok2033)</i>               | 34 | 23.42 ± 0.56 | 103 | 21%                                                       | <0.0001                      | Not shown |
| <i>hif-1(ia04)</i>                 | 35 | 22.41 ± 0.50 | 95  | 16%                                                       | <0.0001                      | Not shown |
| <i>maa-1(ok2033);hif-1(ia04)</i>   | 30 | 19.22 ± 0.45 | 103 | -0.6% vs WT<br>-18% vs <i>maa-1</i>                       | 0.7483<br><0.0001            | Not shown |
| WT                                 | 30 | 21.17 ± 0.43 | 103 |                                                           |                              | Not shown |
| <i>maa-1(ok2033)</i>               | 32 | 23.21 ± 0.41 | 102 | 10%                                                       | 0.0023                       | Not shown |
| <i>hif-1(ia04)</i>                 | 33 | 23.37 ± 0.46 | 95  | 10%                                                       | 0.0007                       | Not shown |
| <i>maa-1(ok2033);hif-1(ia04)</i>   | 28 | 20.49 ± 0.38 | 102 | -3% vs WT<br>-12% vs <i>maa-1</i>                         | 0.0690<br><0.0001            | Not shown |
| WT                                 | 31 | 18.86 ± 0.41 | 103 |                                                           |                              | 4E        |
| <i>maa-1(ok2033)</i>               | 34 | 24 ± 0.53    | 101 | 27%                                                       | < 0.0001                     | 4E        |
| <i>vhl-1(ok161)</i>                | 34 | 25.14 ± 0.63 | 77  | 35%                                                       | < 0.0001                     | 4E        |
| <i>maa-1(ok2033);vhl-1(ok161)</i>  | 34 | 23.96 ± 0.48 | 107 | 27% vs WT<br>-0.2% vs <i>maa-1</i><br>-5% vs <i>vhl-1</i> | < 0.0001<br>0.8449<br>0.0692 | 4E        |
| WT                                 | 30 | 19.56 ± 0.43 | 125 |                                                           |                              | Not shown |
| <i>maa-1(ok2033)</i>               | 37 | 24.13 ± 0.47 | 128 | 23%                                                       | < 0.0001                     | Not shown |
| <i>vhl-1(ok161)</i>                | 39 | 26.52 ± 0.50 | 141 | 35%                                                       | < 0.0001                     | Not shown |
| <i>maa-1(ok2033); vhl-1(ok161)</i> | 35 | 24.29 ± 0.48 | 125 | 24% vs WT<br>0.6% vs <i>maa-1</i><br>-8% vs <i>vhl-1</i>  | < 0.0001<br>0.8602<br><0.001 | Not shown |
| WT/control RNAi                    | 30 | 19.56 ± 0.43 | 125 |                                                           |                              | 4F        |
| WT/ <i>maa-1</i> RNAi              | 31 | 22.48 ± 0.44 | 102 | 15%                                                       | <0.001                       | 4F        |
| <i>hif-1</i> OE                    | 33 | 26.96 ± 0.45 | 98  | 38%                                                       | < 0.0001                     | 4F        |
| <i>hif-1</i> OE/ <i>maa-1</i> RNAi | 33 | 25.91 ± 0.47 | 102 | 32% vs WT<br>-4% vs <i>hif-1</i> OE                       | < 0.0001<br>0.067            | 4F        |
| WT/control RNAi                    | 25 | 16.57 ± 0.43 | 118 |                                                           |                              | Not shown |
| WT/ <i>maa-1</i> RNAi              | 30 | 18.88±0.42   | 124 | 13%                                                       | <0.001                       | Not shown |
| <i>hif-1</i> OE                    | 32 | 23.54 ± 0.39 | 109 | 42%                                                       | < 0.0001                     | Not shown |
| <i>hif-1</i> OE/ <i>maa-1</i> RNAi | 32 | 24.59 ± 0.37 | 108 | 48%<br>4% vs <i>hif-1</i> OE                              | < 0.0001<br>0.0981           | Not shown |

|                                     |    |              |     |                                    |                     |           |
|-------------------------------------|----|--------------|-----|------------------------------------|---------------------|-----------|
| <b>WT</b>                           | 28 | 20.88 ± 0.28 | 183 |                                    |                     | 5         |
| <i>maa-1(ok2033)</i>                | 33 | 24.68 ± 0.32 | 189 | 18%                                | < 0.0001            | 5         |
| <i>daf-16(mu86)</i>                 | 22 | 16.07 ± 0.29 | 100 | -23%                               | < 0.0001            | 5         |
| <i>maa-1(ok2033);daf-16(mu86)</i>   | 22 | 15.06 ± 0.23 | 98  | -28% vs WT<br>-39% vs <i>maa-1</i> | < 0.0001<br><0.0001 | 5         |
| <i>daf-16(mu86)</i>                 | 24 | 17.17 ± 0.38 | 103 |                                    |                     | Not shown |
| <i>maa-1(ok2033);daf-16(mu86)</i>   | 26 | 18.26 ± 0.39 | 97  | 6% vs <i>daf-16</i>                | 0.0396              | Not shown |
| <b>WT</b>                           | 33 | 18.17±0.42   | 115 |                                    |                     | Not shown |
| <i>maa-1(ok2033)</i>                | 35 | 22.14±0.49   | 124 | 22%                                | < 0.0001            | Not shown |
| <i>daf-16(mu86)</i>                 | 25 | 16.71±0.21   | 121 | -8%                                | < 0.005             | Not shown |
| <i>maa-1(ok2033);daf-16(mu86)</i>   | 25 | 17.04±0.19   | 114 | -6% vs WT<br>-23% vs <i>maa-1</i>  | 0.0137<br>< 0.0001  | Not shown |
| <b>WT/control RNAi</b>              | 28 | 19.60± 0.52  | 140 |                                    |                     | 6B        |
| <b>WT/hsp-16.1 RNAi</b>             | 28 | 18.64 ± 0.48 | 161 | -5%                                | 0.1024              | 6B        |
| <b>WT/hsp-16.49 RNAi</b>            | 28 | 18.78± 0.52  | 160 | -4%                                | 0.2988              | 6B        |
| <i>maa-1(ok2033)/control RNAi</i>   | 36 | 25.80 ± 0.52 | 133 |                                    |                     | 6C        |
| <i>maa-1(ok2033)/hsp-16.1 RNAi</i>  | 32 | 19.76 ± 0.63 | 146 | -23%<br>vs <i>maa-1</i>            | < 0.0001            | 6C        |
| <i>maa-1(ok2033)/hsp-16.49 RNAi</i> | 32 | 18.81 ± 0.59 | 158 | -27%<br>vs <i>maa-1</i>            | < 0.0001            | 6C        |
| <b>WT/control RNAi</b>              | 32 | 19.54 ± 0.63 | 153 |                                    |                     | Not shown |
| <b>WT/hsp-16.1 RNAi</b>             | 27 | 17.93 ± 0.56 | 152 | -8%                                | <0.001              | Not shown |
| <b>WT/hsp-16.49 RNAi</b>            | 29 | 18.18 ± 0.60 | 160 | -7%                                | 0.0078              | Not shown |
| <i>maa-1(ok2033)/control RNAi</i>   | 33 | 22.93 ± 0.52 | 160 |                                    |                     | Not shown |
| <i>maa-1(ok2033)/hsp-16.1 RNAi</i>  | 31 | 19.66 ± 0.49 | 160 | -14%<br>vs <i>maa-1</i>            | < 0.0001            | Not shown |
| <i>maa-1(ok2033)/hsp-16.49 RNAi</i> | 31 | 19.14 ± 0.53 | 140 | -17%<br>vs <i>maa-1</i>            | < 0.0001            | Not shown |

|                                     |    |            |    |                         |          |           |
|-------------------------------------|----|------------|----|-------------------------|----------|-----------|
| <b>WT/control RNAi</b>              | 28 | 18.89±0.58 | 97 |                         |          | Not shown |
| <b>WT/hsp-16.1 RNAi</b>             | 30 | 17.44±0.48 | 95 | -8%                     | 0.0838   | Not shown |
| <b>WT/hsp-16.49 RNAi</b>            | 26 | 18.44±0.55 | 86 | -2%                     | 0.5796   | Not shown |
| <b>maa-1(ok2033)/control RNAi</b>   | 32 | 23.66±0.60 | 79 |                         |          | Not shown |
| <b>maa-1(ok2033)/hsp-16.1 RNAi</b>  | 30 | 19.08±0.53 | 98 | -19%<br>vs <i>maa-1</i> | < 0.0001 | Not shown |
| <b>maa-1(ok2033)/hsp-16.49 RNAi</b> | 30 | 20.12±0.74 | 60 | -15%<br>vs <i>maa-1</i> | < 0.05   | Not shown |

**Table S2. Results of two-tailed t-test performed on replicate experiments shown in Table S1.**

| <b>Comparison</b>                                  | <b>N (number of experiments)</b> | <b>Average change (mean lifespan)</b> | <b>P-value (mean life span)</b> | <b>P-value (maximum lifespan)</b> |
|----------------------------------------------------|----------------------------------|---------------------------------------|---------------------------------|-----------------------------------|
| <b>WT/control RNAi vs WT/maa-1 RNAi</b>            | 5                                | 17%                                   | <0.005                          | <0.05                             |
| <b>WT vs maa-1(ok2033)</b>                         | 10                               | 20.7%                                 | <0.0001                         | <0.0001                           |
| <b>MR0391/control RNAi vs MR0931/maa-1 RNAi</b>    | 3                                | 13%                                   | <0.05                           | 0.0634                            |
| <b>JM43/control RNAi vs JM43/maa-1 RNAi</b>        | 3                                | 5%                                    | 0.1106                          | 0.8740                            |
| <b>WT vs maa-1(ok2033);hif-1(ia04)</b>             | 3                                | 0.4%                                  | 1                               | 1                                 |
| <b>maa-1(ok2033) vs maa-1(ok2033);hif-1(ia04)</b>  | 3                                | -15.3%                                | <0.05                           | <0.05                             |
| <b>WT vs hif-1(ia04)</b>                           | 3                                | 11.7%                                 | <0.05                           | 0.0634                            |
| <b>maa-1(ok2033);hif-1(ia04) vs hif-1(ia04)</b>    | 3                                | 12%                                   | 0.0672                          | 0.0572                            |
| <b>WT vs maa-1(ok2033);daf-16(mu86)</b>            | 2                                | -17.1%                                | 0.3701                          | 0.3500                            |
| <b>maa-1(ok2033) vs maa-1(ok2033);daf-16(mu86)</b> | 2                                | -31%                                  | 0.1891                          | <0.05                             |



|                                                                                  |   |        |        |        |
|----------------------------------------------------------------------------------|---|--------|--------|--------|
| <b>WT vs <i>daf-16(mu86)</i></b>                                                 | 2 | -15.5% | 0.3072 | 0.0903 |
| <b><i>maa-1(ok2033); daf-16(mu86)</i> vs <i>daf-16(mu86)</i></b>                 | 3 | 0.7%   | 0.8477 | 0.4226 |
| <b><i>hif-1 OE</i> vs <i>hif-1 OE/maa-1 RNAi</i></b>                             | 2 | 0      | 1      | 1      |
| <b><i>vhl-1(ok161)</i> vs <i>maa-1(ok2033); vhl-1(ok161)</i></b>                 | 2 | -6.5%  | 0.2048 | 0.5    |
| <b>WT/control RNAi vs WT/<i>hsp-16.1</i> RNAi</b>                                | 3 | -7%    | <0.05  | 0.7418 |
| <b>WT/control RNAi vs WT/<i>hsp-16.49</i> RNAi</b>                               | 3 | -4.3%  | 0.0801 | 0.4226 |
| <b><i>maa-1(ok2033)/control RNAi</i> vs <i>maa-1(ok2033)/ hsp-16.1 RNAi</i></b>  | 3 | -18.7% | <0.05  | 0.0572 |
| <b><i>maa-1(ok2033)/control RNAi</i> vs <i>maa-1(ok2033)/ hsp-16.49 RNAi</i></b> | 3 | -19.7% | 0.0501 | 0.0572 |
